# Supplementary material for: Migraine and body mass index categories: a systematic review and meta-analysis of observational studies
Source: J Headache Pain. 2015 Mar 28;16:27. doi: 10.1186/s10194-015-0510-z (PMC4385329; doi:10.1186/s10194-015-0510-z)

**Outcome: any migraine**  
**Exposure: obesity**  
**Reference: non-obese**

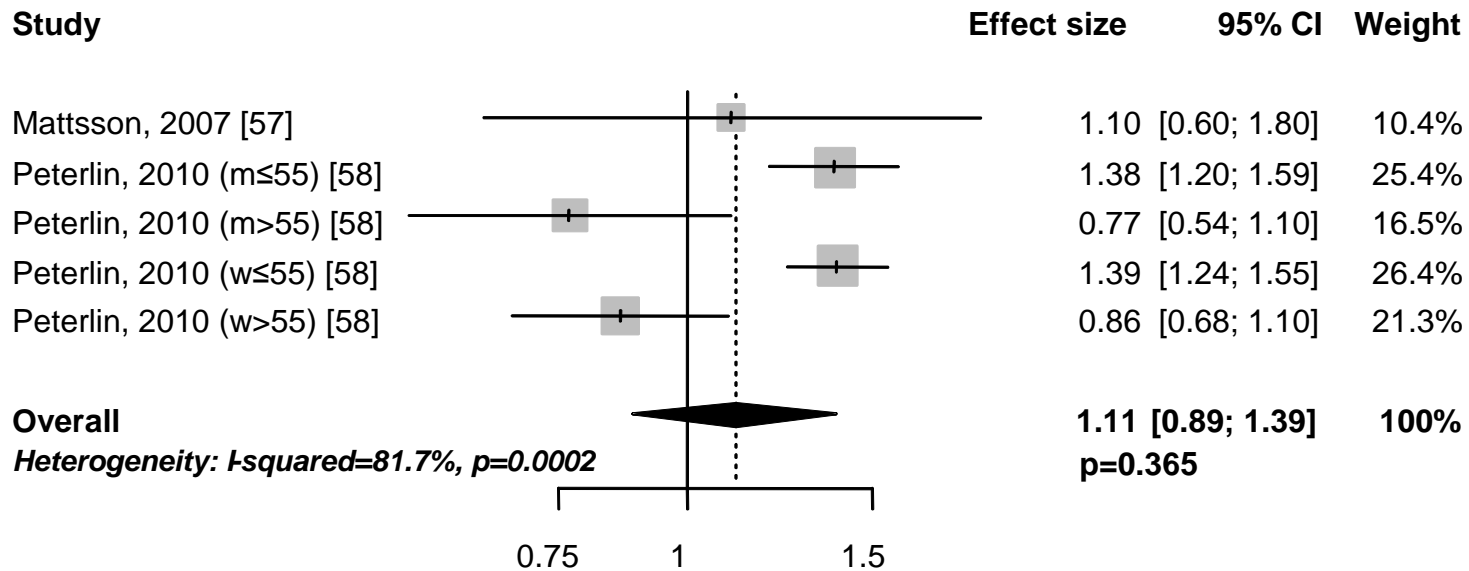

Women

Outcome: any migraine  
Exposure: pre-obesity  
Reference: normal weight

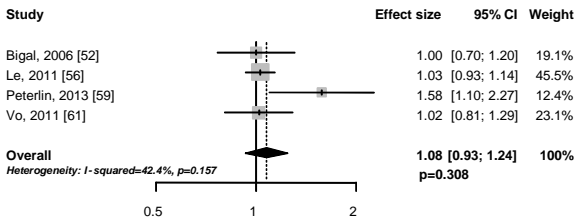

Outcome: any migraine  
Exposure: underweight  
Reference: normal weight

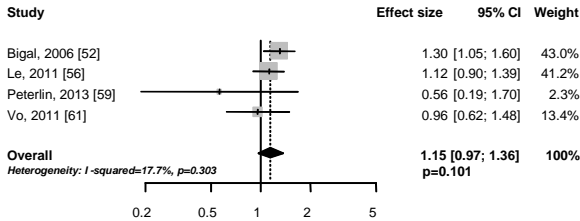

Men

Outcome: any migraine  
Exposure: obesity  
Reference: normal weight

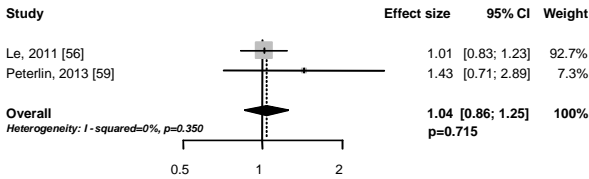

Outcome: any migraine  
Exposure: pre-obesity  
Reference: normal weight

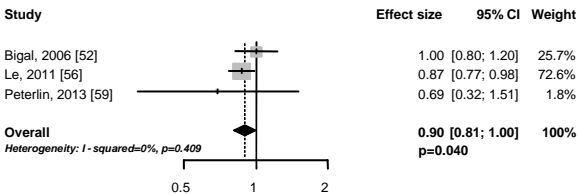

Outcome: any migraine  
Exposure: underweight  
Reference: normal weight

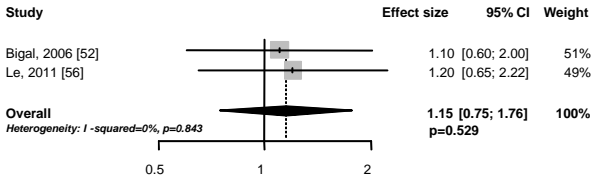

**Outcome: obesity**  
**Exposure: any migraine**  
**Reference: no migraine**

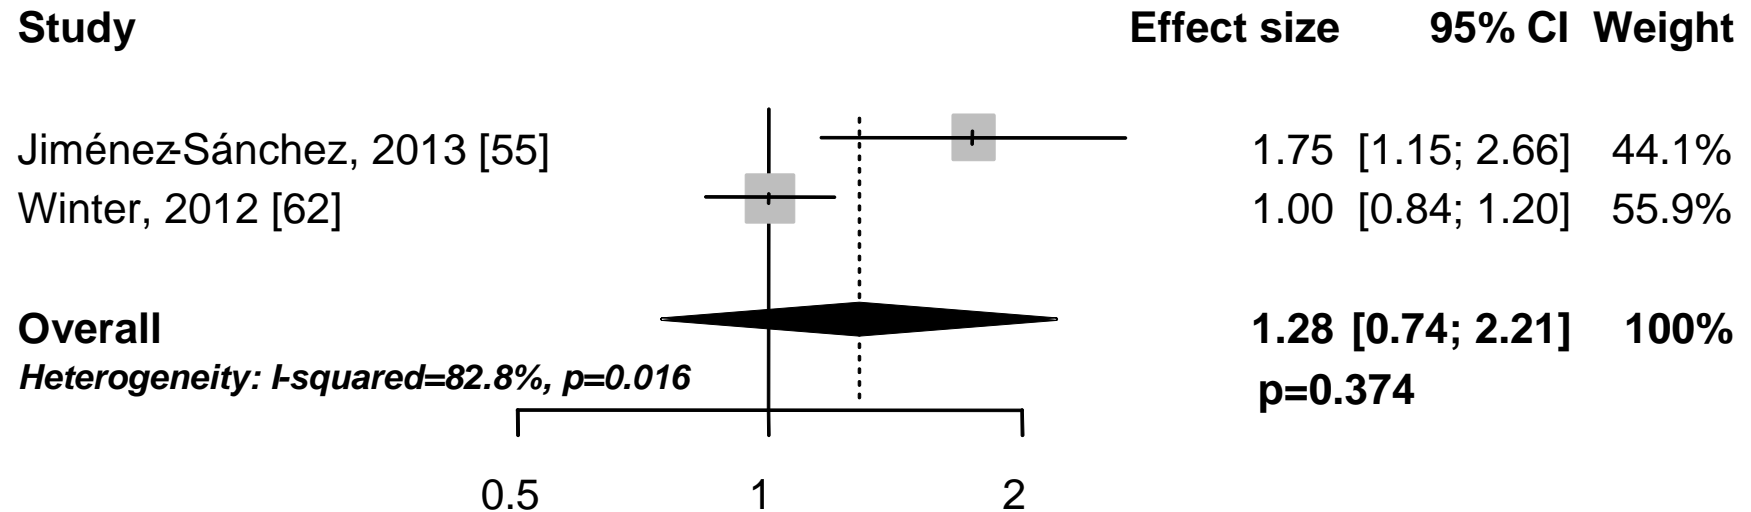

Supplement: Additional file 2: — Funnel plots of further analyses. [file 10194_2015_510_MOESM2_ESM.pdf]
